# Supplementary material
Source: Springer Nature journal article supplement (https://www.springermedizin.de/resource/supplementary/12960_2010_251_MOESM5_ESM.pdf/9570746)

Incoming medical students ( $\approx$  quota)

6 years

New graduates from medical school

Pass Rate of national exam for medical doctors

Baseline: current supply of doctors stratified by sex and age (2008)

Predictions: Future supply of doctors stratified by sex and age

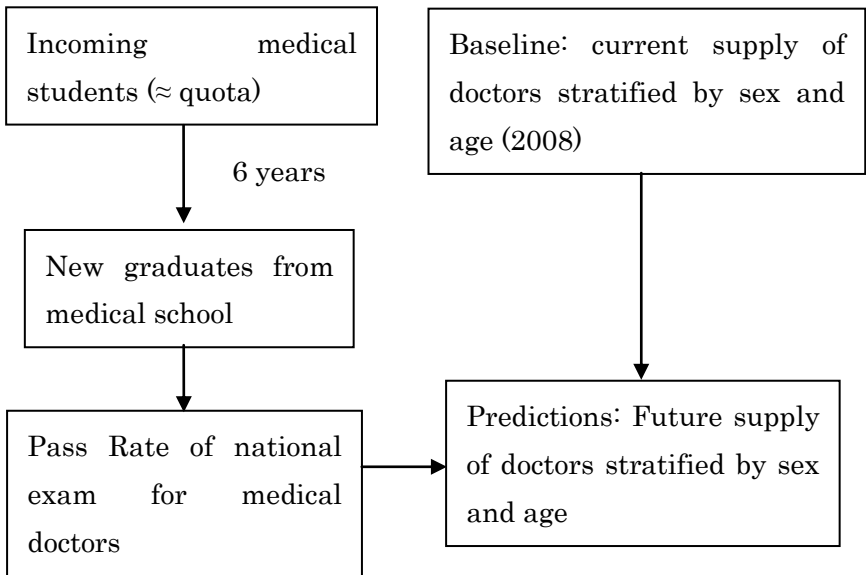

Supplement: MOESM5 [file 9570746]
